# Supplementary material
Source: publisher figshare collection journal article supplement (https://acs.figshare.com/ndownloader/files/12904595)
Supplement: Supplementary file 1 [file 12904595]

## **Supplementary Information:**

### **Reinforcement Learning for Dynamic Microfluidic Control**

Oliver J. Dressler,<sup>a</sup> Philip D. Howes,<sup>a</sup> Jaebum Choo,<sup>b</sup> & Andrew J. deMello<sup>a\*</sup>

(a) Institute for Chemical and Bioengineering, Department of Chemistry and Applied Biosciences, ETH Zürich, Vladimir Prelog Weg 1, 8093 Zürich, Switzerland. (b) Department of Bionano Technology, Hanyang University, Ansan 426-791, South Korea

## **Figures**

Figure S1: Device architectures

Figure S2: Laminar flow challenge raw data

Figure S3: Droplet size challenge raw data

A

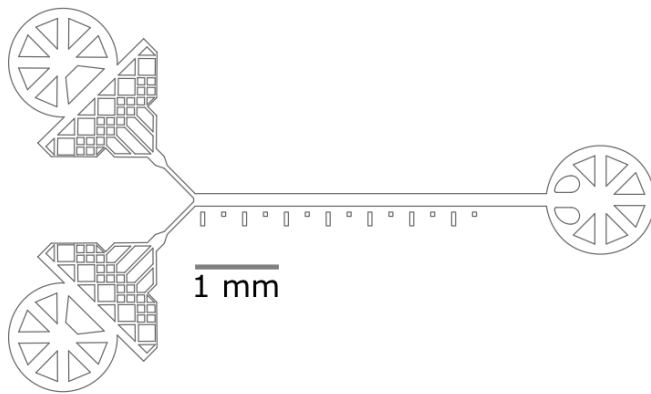

B

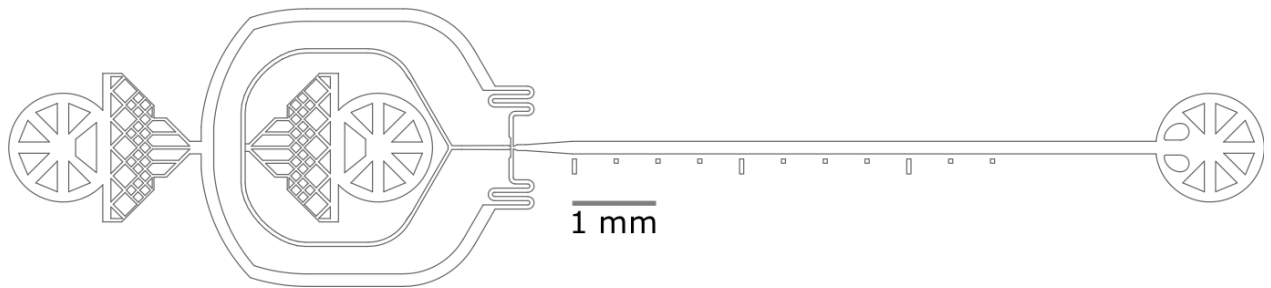

**Supplementary Figure 1.** Designs of the A) Laminar flow and B) Droplet devices.

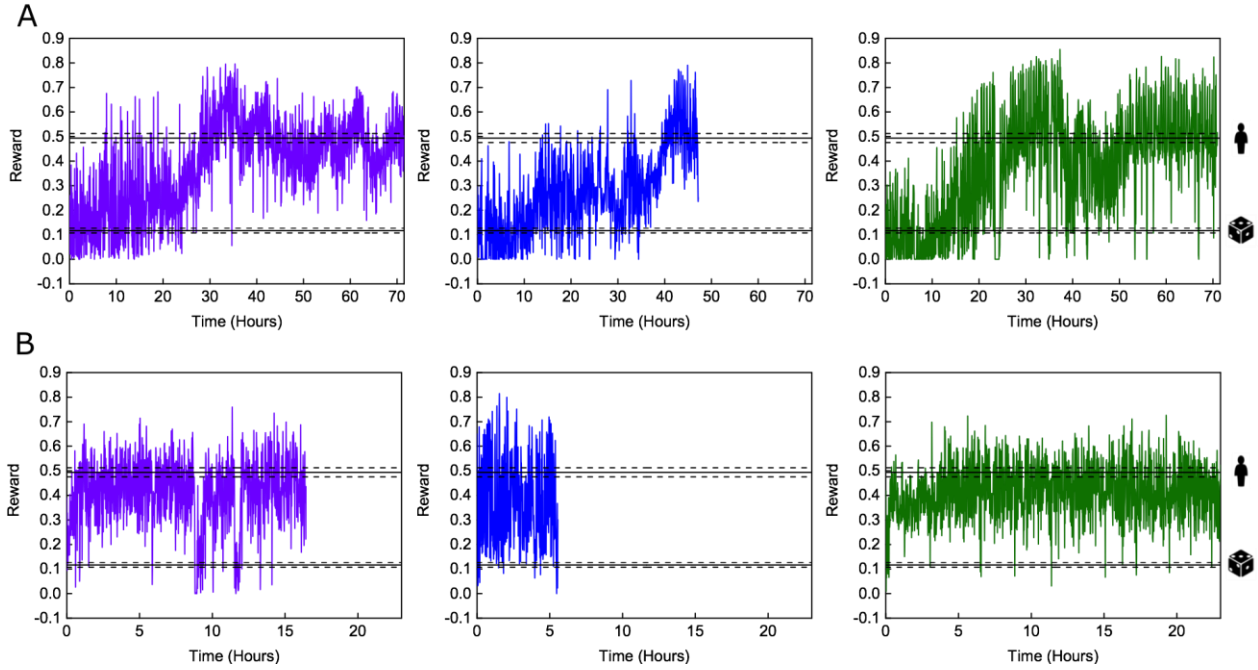

**Supplementary Figure 2.** Raw data for experimental repeats of the laminar flow challenge. A) DQN and B) MFEC. Human performance level is indicated with a human icon, and random performance level is indicated with a die icon. Mean = solid line. 95 % confidence intervals = dashed line.

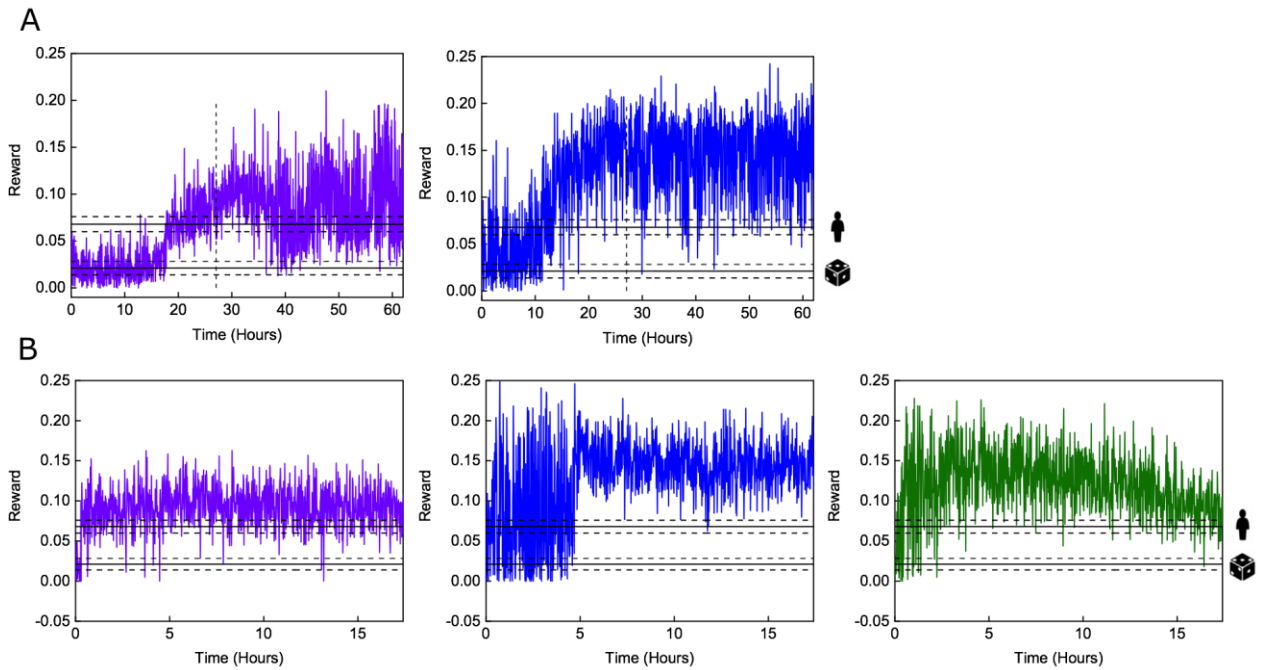

**Supplementary Figure 3.** Raw data for experimental repeats of the droplet size control challenge. A) DQN and B) MFEC. Human performance level is indicated with a human icon, and random performance level is indicated with a die icon. Mean = solid line. 95 % confidence intervals = dashed line.
